# Supplementary material for: Evaluating the influence of a constraint manipulation on technical, tactical and physical athlete behaviour
Source: PLoS One. 2022 Dec 1;17(12):e0278644. doi: 10.1371/journal.pone.0278644 (PMC9714935; doi:10.1371/journal.pone.0278644)
Supplement: S1 Data — (CSV) [file pone.0278644.s001.csv]

Constraint	Repetition.Duration	Total.Disposals	Efficiency	Percentage.Kicks	Disposal.Speed	Surface.Area	Surface.Area.1SD	Velocity	Velocity.1SD	HIR	HIR.1SD
Advantage	7	2	100	50	17.14321036	176.2679653	7.121219718	-21.72334184	26.06902578	-34.64187925	24.35142294
Advantage	14.6	2	100	100	8.219172312	398.803166	67.43235842	17.23197978	-2.467805837	1.632420091	13.97586782
Advantage	8.3	1	100	100	7.228543538	25.43137119	-19.97815731	-13.71507458	20.76131079	7.794320138	37.93990064
Advantage	27.9	6	83.3	66.7	12.90402939	285.3495358	39.16944603	24.0406746	17.44661949	15.69231097	28.13766324
Advantage	27.9	5	100	100	10.75263408	293.5023916	59.38894994	11.68137157	4.437337412	8.869701013	19.729109
Advantage	8.6	3	66.7	100	20.92686813	211.3430788	-31.59543386	-31.97778239	-10.55480876	-29.99020626	-16.71912947
Advantage	21	4	50	50	11.42861573	206.9082393	58.69525247	-9.216680839	5.480289088	1.983829365	-4.880391906
Advantage	21.1	3	66.7	66.7	8.530367173	298.2053339	107.437001	2.38588919	13.79004401	9.245923606	10.27627498
Advantage	14.8	3	100	100	12.15228138	179.072548	-58.91238457	27.62751907	32.37275754	45.40786644	50.59822853
Advantage	13.8	2	100	100	8.695901666	222.7214958	44.60512516	-15.61126979	-9.919648031	-33.48990683	-12.31083459
Advantage	16.2	3	100	100	11.11083194	194.6698298	39.27355217	11.2563933	15.89023338	1.164021164	44.54791704
Advantage	36	4	100	100	6.666568637	128.2841857	15.90563074	11.47327216	11.10524591	16.94058366	30.93458636
Advantage	22.5	5	100	100	13.33304408	365.7529829	12.63877485	11.95338203	2.526048598	-9.88655303	5.775508674
Advantage	20.4	4	100	75	11.76506299	308.5753118	-27.49171267	24.63659226	9.199606312	15.1441369	19.04196527
Advantage	22.2	4	100	50	10.8107587	309.9159876	-17.21481301	15.00003882	2.570092215	-1.661348344	10.20742815
Advantage	14	3	100	100	12.85503453	-67.00365186	0.333074215	17.17952806	19.57575696	23.34496173	24.6943077
Advantage	21.2	3	100	100	8.489519861	241.5572218	-28.9292212	13.19117063	22.37550258	-0.96850907	8.358085224
Advantage	13.7	4	100	75	17.50503947	383.8307791	2.770921421	8.789094388	16.72370746	21.35493197	25.25479228
Advantage	8.3	2	100	50	14.43950559	-243.4413127	15.10296046	20.7719122	0.365244737	31.61450893	32.45347151
Advantage	6.5	1	100	100	9.21271917	107.7129168	23.04487244	-11.87240646	3.797852908	0.366666667	21.08838984
Advantage	11.1	2	100	100	10.81018674	177.9722834	-51.21141893	63.57526931	-11.37097168	40.96301056	41.94960679
Advantage	11.1	3	100	66.7	16.21572904	224.6273398	7.242631856	-9.268111854	37.07296277	12.41046176	14.81054719
Advantage	26.3	4	100	100	9.128705212	420.0379998	103.1768608	-9.748774721	26.62576276	-2.592766724	6.65523658
Advantage	8.2	1	100	100	7.316764207	633.5566999	450.0601084	-3.783928571	36.51624349	6.783035714	2.530219501
Advantage	5.7	1	100	100	10.52603132	391.0114616	-11.12871804	-29.2952381	14.69989184	-34.58457341	-38.14784472
Advantage	6.1	1	100	100	9.83617009	317.4751392	-9.41215842	19.25481151	30.58663871	4.747123016	14.6535016
Advantage	7.8	1	100	100	7.692991129	-283.1591014	53.33284077	-4.647284226	-52.97165569	-53.5233631	-32.51896067
Advantage	16.6	3	66.7	66.7	10.83569487	569.8178227	151.9023177	-19.36373181	-23.26510152	-18.05009301	-35.24492857
Advantage	18.8	3	66.7	100	9.567082303	276.8478272	67.21996838	-8.224749373	-6.651817742	-3.456516291	-6.055009285
Advantage	32.2	5	100	100	9.316753205	301.3376124	-4.976404364	27.45572063	9.137193425	7.255425285	-7.145183161
Advantage	13.9	2	50	100	8.625450538	443.7855622	41.36854833	1.356688698	-4.052059966	-26.64270318	-11.31363116
Advantage	26.2	4	100	100	9.160386846	500.6303825	-7.028216253	25.12466052	3.307383368	16.34408196	0.126835754
Disadvantage	29.4	4	75	100	8.157355385	112.3522364	118.3846936	66.77497982	5.731046641	61.03736885	16.26005125
Disadvantage	14.5	3	100	100	12.41361565	86.22467102	15.65844659	63.45162151	-0.756023813	82.40215517	-3.475527266
Disadvantage	20.6	3	100	66.7	8.738503333	244.1956346	25.54038488	48.01106681	12.54083304	82.19631299	11.42466852
Disadvantage	42.6	7	71.4	100	9.85954812	155.7022745	28.81737244	12.81937458	-0.720778378	10.43171529	-10.88664848
Disadvantage	25.6	5	80	80	11.71848859	53.5610134	27.66955233	28.93463378	11.72875676	31.32607508	12.43374728
Disadvantage	31.8	5	80	80	9.433665175	95.76731413	75.71716983	53.33614106	-0.327533219	48.93432727	16.37979755
Disadvantage	60.7	8	87.5	100	7.907818327	80.97935939	30.48890369	36.03092394	-2.898855395	22.24632266	-13.85569671
Disadvantage	22.3	5	80	60	13.44573778	-77.43951773	24.38089756	22.20980141	11.93481272	13.10452701	1.694857946
Disadvantage	54.8	6	83.3	100	6.56762484	10.29834509	25.87657053	29.08914451	15.02058038	12.93420881	15.80454482
Disadvantage	22.1	4	100	100	10.86040669	19.30241648	-65.34105964	19.2253437	1.023262104	23.47986391	22.218468
Disadvantage	13.9	3	100	66.7	12.94890285	55.63957041	-37.69958965	13.7674439	8.544524746	5.036799846	10.33911655
Disadvantage	20.4	3	100	100	8.822432143	-97.59048957	69.19697836	24.6749256	-4.249177289	31.1981994	16.04049766
Disadvantage	8.4	1	100	100	7.133801262	-86.486988	4.253973734	53.221875	18.68333587	32.3	37.47736564
Disadvantage	12.3	3	100	66.7	14.63701757	105.8723116	-2.598449226	24.41005037	7.702171047	43.35899725	31.97505111
Disadvantage	16.7	3	100	66.7	10.77831431	17.73849933	-63.63086282	26.14390756	11.40093576	30.65057773	8.115012603
Disadvantage	8.3	1	100	100	7.230059923	-222.9541879	4.706240775	8.672354497	12.23077513	11.39867725	24.36307227
Disadvantage	8.7	2	50	100	13.79324236	-157.3402159	29.18048202	16.43098958	15.2606842	14.8265253	22.69915082
Disadvantage	9.3	2	100	100	12.90243646	-136.3591383	-35.93744512	24.85750661	10.34074019	8.346494709	35.99808127
Disadvantage	12.1	2	100	100	9.909118978	42.02547608	71.62226669	25.31852679	1.429366878	20.3936756	-0.401496417
Disadvantage	10.6	1	100	100	5.660474494	319.059261	0.967201857	5.592559524	-20.98953703	7.992099567	-11.73920336
Disadvantage	34.6	5	100	40	8.670427365	119.7891288	41.02854166	16.19486395	0.231190204	22.76284864	-3.309060123
Disadvantage	27	3	66.7	100	6.668257513	317.4825663	55.16476895	8.519008092	46.67286059	7.172310406	12.74690608
Disadvantage	21	4	75	75	11.40215582	200.7167538	67.63264409	-6.368006024	41.05201184	0.545360493	2.8833888
Disadvantage	34.2	4	100	100	7.017754247	287.8911123	10.82770175	10.21155285	54.95314397	18.00466562	20.10648127
Disadvantage	19.1	4	100	100	12.56431436	158.4696585	104.2634644	42.91560456	-41.39968166	19.93450893	14.70580518
Disadvantage	21.9	6	83.3	66.7	16.43823569	-109.1225017	30.27859171	42.2120671	-29.58394549	22.06638258	13.11266176
Disadvantage	14.6	3	100	66.7	12.31936232	-55.20209399	31.580852	65.8326769	9.56300192	44.4503367	78.90342282
Disadvantage	7.6	2	100	100	15.79066062	-545.3169586	-146.7008036	9.598164683	-23.58488735	-1.944270833	7.913761396
Disadvantage	31.9	5	80	100	9.40438454	-105.6518181	-144.0588156	28.00959089	-25.11688423	15.14307378	16.58260196
Disadvantage	10.9	3	100	66.7	16.49425663	388.3301224	-17.25019818	-20.94104437	41.56501679	-6.028300866	21.02002553
Disadvantage	11.4	3	33.3	66.7	15.78975053	330.0506021	44.26780428	-7.484548679	35.52608435	11.54604978	9.39744018
Disadvantage	15.3	2	100	100	7.843005241	-243.276794	14.80854715	7.604308361	-25.15736508	9.697242063	-19.46959179
Disadvantage	28.6	3	100	100	6.293690487	4.806403358	31.05538972	28.96268203	-0.169186666	-5.390969942	6.21926092
Disadvantage	45.3	4	100	100	5.296386888	-65.79783504	-15.86434873	22.20987147	-2.306012828	20.35861044	5.578441109
Disadvantage	18.9	2	50	100	6.34946314	-252.8311393	-12.1484796	39.90649335	9.559376629	40.17608083	23.72586771
Disadvantage	31.6	5	80	80	9.503210488	26.96810753	68.6634787	31.7221496	-0.28653937	28.66121304	18.77508064
Disadvantage	24.5	4	100	100	9.795575834	-157.9649106	15.06398176	28.11685931	12.94683277	39.69113805	30.82436143
